# Supplementary material
Source: Springer Nature journal article supplement (https://www.springermedizin.de/resource/supplementary/12874_2008_317_MOESM3_ESM.pdf/9434236)

**Placebo**

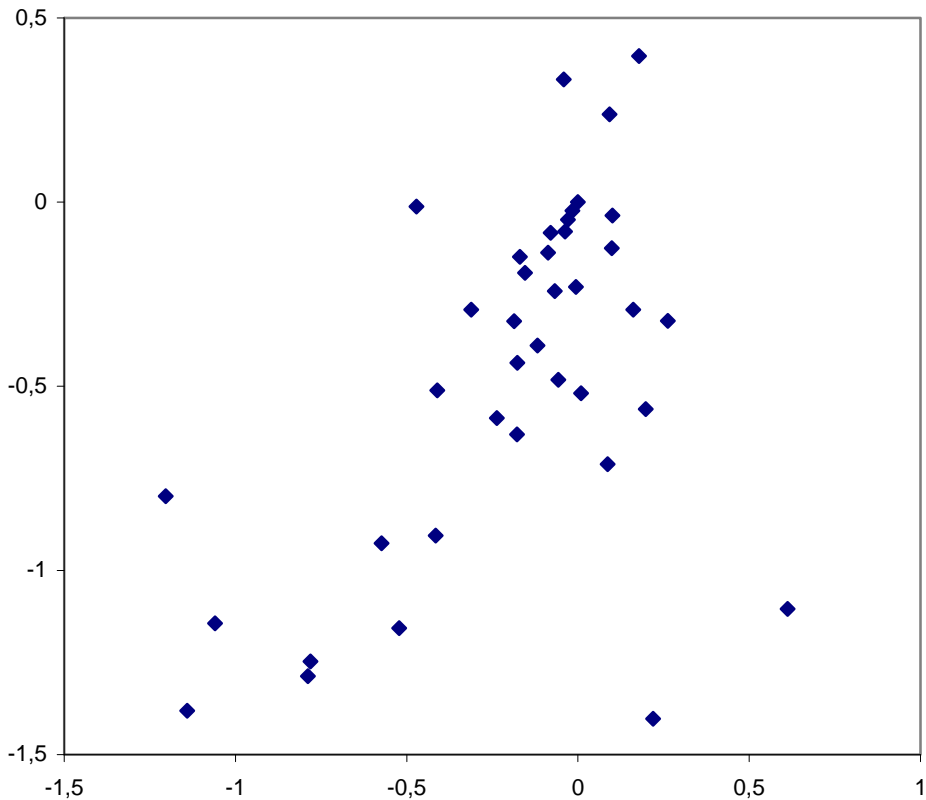

**No treatment**

Supplement: MOESM3 [file 9434236]
